# Supplementary material for: Early deglacial Atlantic overturning decline and its role in atmospheric CO 2 rise inferred from carbon isotopes (δ 13 C)
Source: Copernicus journal article supplement (doi:10.5194/cp-11-135-2015), 2015-02-05
Supplement: Supplementary file 1 [file cp-11-135-2015-supplement.zip]

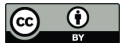

## *Supplement of*

# **Early deglacial Atlantic overturning decline and its role in atmospheric CO<sub>2</sub> rise inferred from carbon isotopes ( $\delta^{13}\text{C}$ )**

**A. Schmittner and D. C. Lund**

*Correspondence to:* A. Schmittner (aschmitt@coas.oregonstate.edu)

- cp-11-135-2015-supplement-cover-letter.pdf
- H1\_LGM\_c13\_ocean\_all.dat
- README
- d13c\_H1\_LGM\_all\_mod05.dat
- d13c\_H1\_LGM\_all\_mod1.dat
- d13c\_H1\_LGM\_all\_mod15.dat
- d13c\_H1\_LGM\_all\_mod2.dat
- d13c\_dic\_FW0.15.nc
- sed\_data
  - .DS\_Store
  - benway10qsr
    - \* ODP980.nc
    - \* benway2010.txt
    - \* benway2010.xlsx
    - \* c13\_time.csv
    - \* c13\_time.xlsx
    - \* read.jnl
  - charles96eps1
    - \* RC11-83\_age\_model\_d18O\_d13C.tab
    - \* RC11\_83.nc
    - \* README
    - \* charles1996.txt
    - \* charles1996.xlsx
    - \* charles1996\_time.csv

- \* charles1996\_time.csv
- \* charles1996\_time.ods
- \* read\_RC11-83.jnl
- \* read\_RC11-83.jnl
- hodel110qsr
  - \* JPC-13.nc
  - \* JPC-13\_cib\_iso.xlsx
  - \* JPC-13\_cib\_iso\_time.csv
  - \* JPC-13\_cib\_iso\_time.xlsx
  - \* hodel12010.xls
  - \* read.jnl
- jung09epsl
  - \* lock.jung2009\_time.csv#
  - \* NIOP905.nc
  - \* jung2009.txt
  - \* jung2009.xls
  - \* jung2009\_time.csv
  - \* read.jnl
- lund11natgeo
  - \* .DS\_Store
  - \* README
  - \* read\_w87.jnl
  - \* w8709a\_13pc.nc
  - \* w8709a\_13pc\_iso.txt
  - \* w8709a\_13pc\_iso\_time.csv
  - \* w8709a\_13pc\_iso\_time.txt
  - \* w8709a\_13pc\_iso\_time.xlsx
- lund14po
  - \* M35003.nc
  - \* M35003\_17Sept2014\_time.csv
  - \* MD01-2461.nc
  - \* MD01\_2461\_18Sept2014.txt
  - \* MD01\_2461\_18Sept2014.xlsx
  - \* MD01\_2461\_18Sept2014\_time.csv
  - \* MD01\_2461\_18Sept2014\_time.txt
  - \* MD01\_2461\_18Sept2014\_time.xlsx
  - \* ODP984.nc
  - \* ODP984\_17Sept2014\_time.csv
  - \* RAPID-10-1P.nc
  - \* RAPIP10\_1P\_17Sept2014\_time.csv
  - \* SO75\_26KL.nc
  - \* SO75\_26KL\_17Sept2014\_time.csv
  - \* datave125c.nc
  - \* datave125c\_time.csv
  - \* datave30c.nc
  - \* datave30c\_time.csv

- \* datave36c.nc
- \* datave36c\_time.csv
- \* datave42c.nc
- \* datave42c\_time.csv
- \* datave90c.nc
- \* datave90c\_time.csv
- \* read\_125c.jnl
- \* read\_30c.jnl
- \* read\_36c.jnl
- \* read\_42c.jnl
- \* read\_90c.jnl
- \* read\_Brazil.jnl
- \* read\_M35003.jnl
- \* read\_MD01-2461.jnl
- \* read\_N35003.jnl
- \* read\_ODP984.jnl
- \* read\_P10\_1.jnl
- \* read\_RAPID10\_1P.jnl
- \* read\_SO75\_26KL.jnl
- lynch-stieglitz14natgeo
  - \* KNR166-2-26JPC.nc
  - \* README
  - \* lynch-stieglitz2014-26jpc-cibavg.txt
  - \* lynch-stieglitz2014-26jpc-ind.txt
  - \* lynch-stieglitz2014-26jpc-p-arim.txt
  - \* lynch-stieglitz2014-26jpc-p-arim.xlsx
  - \* lynch-stieglitz2014-26jpc-p-arim\_time.csv
  - \* lynch-stieglitz2014-26jpc-p-arim\_time.xlsx
  - \* lynch-stieglitz2014-73ggc-cibavg.txt
  - \* lynch-stieglitz2014-73ggc-ind.txt
  - \* lynch-stieglitz2014-73ggc-pachy.txt
  - \* ngeo2045-s2.xls
  - \* read.jnl
- pahnke05sci
  - \* .lock.MD972120\_time.csv#
  - \* MD972120.nc
  - \* MD972120\_forASchmittner.xlsx
  - \* MD972120\_time.csv
  - \* MD972120\_time.xlsx
  - \* read.jnl
- praetorius08natgeo
  - \* ODP984.nc
  - \* praetorius2008.txt
  - \* praetorius2008.xls
  - \* praetorius2008\_time.csv
  - \* praetorius2008\_time.xlsx
  - \* read.jnl

- rickaby05ggg
  - \* NEAP4K.nc
  - \* NEAP4Kd13C.xls
  - \* NEAP4Kd13C\_2.xls
  - \* NEAP4Kd13C\_time.csv
  - \* NEAP4Kd13C\_time.xls
  - \* read.jnl
- sirocko93nat
  - \* .lock.74kl-data\_time.csv#
  - \* 74KL.nc
  - \* 74kl-data.csv
  - \* 74kl-data.xls
  - \* 74kl-data\_time.csv
  - \* 74kl-methods.doc
  - \* 74kl-methods.txt
  - \* read.jnl
  - \* readme\_sirocko1993.txt
- skinner04po
  - \* .DS\_Store
  - \* MD99-2334\_d13C.xlsx
  - \* MD99-2334\_d13C\_time.csv
  - \* MD99-2334\_d13C\_time.ods
  - \* MD99\_2334.nc
  - \* datasets
  - \* read\_MD99-2334.jnl
  - \* read\_MD99-2334.jnl
  - \* summary.txt
- tessin13po
  - \* 17JPC.nc
  - \* 17JPC\_av.nc
  - \* 30GGC.nc
  - \* 30GGC\_av.nc
  - \* 33GGC.nc
  - \* 33GGC\_av.nc
  - \* 78GGC.nc
  - \* 78GGC\_av.nc
  - \* calc\_mean.f
  - \* make\_17GGC.jnl
  - \* make\_17JPC.jnl
  - \* make\_30GGC.jnl
  - \* make\_33GGC.jnl
  - \* make\_78GGC.jnl
  - \* read.jnl
  - \* tessin2013-17ggc.txt
  - \* tessin2013-17ggc\_time.csv
  - \* tessin2013-17ggc\_time.xlsx

- \* tessin2013-17ggc\_time\_av.dat
- \* tessin2013-30ggc.txt
- \* tessin2013-30ggc\_time.csv
- \* tessin2013-30ggc\_time.xlsx
- \* tessin2013-30ggc\_time\_av.dat
- \* tessin2013-33ggc.txt
- \* tessin2013-33ggc\_time.csv
- \* tessin2013-33ggc\_time.xlsx
- \* tessin2013-33ggc\_time\_av.dat
- \* tessin2013-78ggc.txt
- \* tessin2013-78ggc\_time.csv
- \* tessin2013-78ggc\_time.xlsx
- \* tessin2013-78ggc\_time\_av.dat
- waelbroeck11po
  - \* .DS\_Store
  - \* MD95-2037.csv
  - \* MD95-2037.ods
  - \* MD95-2037\_time.csv
  - \* MD95-2037\_time.ods
  - \* MD95\_2037.nc
  - \* NA87-22.csv
  - \* NA87-22.ods
  - \* NA87-22\_time.csv
  - \* NA87-22\_time.ods
  - \* NA87\_22.nc
  - \* read\_MD95-2037.jnl
  - \* read\_NA87-22.jnl
- zahn97po
  - \* .DS\_Store
  - \* SO75-26KL\_BEN-ISO + IRD.xls
  - \* SO75-26KL\_age.tab
  - \* SO75-26KL\_age\_control\_points.tab
  - \* c13\_time.csv
  - \* c13\_time.xls
  - \* summary.txt
- ziegler13natgeo
  - \* MD02-2588.nc
  - \* read.jnl
  - \* ziegler2013-benthic.csv
  - \* ziegler2013-benthic.txt
  - \* ziegler2013-benthic.xlsx
  - \* ziegler2013-plank.txt
  - \* ziegler2013ther-deep.txt
